# Supplementary material for: Red-Fleshed Apple Anthocyanin Extract Reduces Furan Content in Ground Coffee, Maillard Model System, and Not-from-Concentrate Apple Juice
Source: MDPI journal article supplement (doi:10.3390/foods10102423), 2021-10-13
Supplement: s1 [file s1]

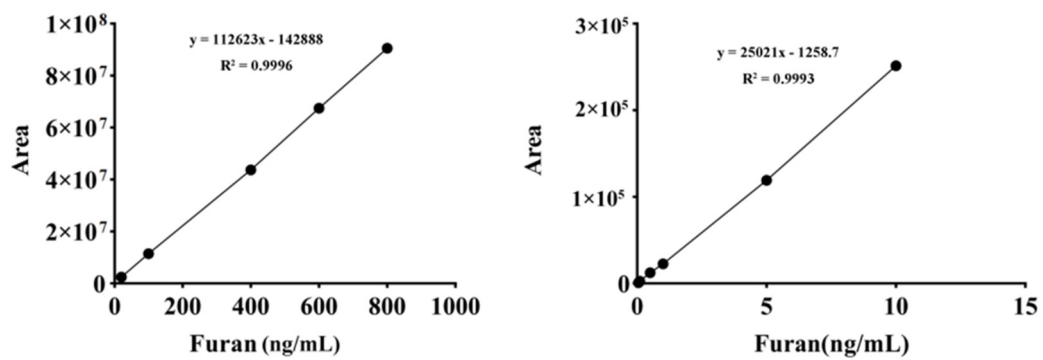

**Figure S1.** (A) Standard curve of furan in the concentration range 20–800 ng/mL; (B) standard curve of furan in the concentration range 0.1–10 ng/mL.
