# Supplementary material for: Red-Fleshed Apple Anthocyanin Extract Reduces Furan Content in Ground Coffee, Maillard Model System, and Not-from-Concentrate Apple Juice
Source: MDPI journal article supplement (doi:10.3390/foods10102423), 2021-10-13
Supplement: s1 [file s1]

**Table S1.** Physiological indexes of RAAEs.

| No. | Variety<br>(Strain) | Fruit Weight<br>(g) | Anthocyanin<br>(mg/kg) | Total Phenols<br>(mg/kg) |
|-----|---------------------|---------------------|------------------------|--------------------------|
| 1   | XJ1                 | 15.30               | 455.00                 | 4983.00                  |
| 2   | XJ2                 | 19.45               | 146.13                 | 2451.43                  |
| 3   | XJ3                 | 23.42               | 476.18                 | 6135.52                  |
| 4   | XJ5                 | 17.49               | 125.31                 | 1893.00                  |
| 5   | XJP5                | 18.73               | 364.94                 | 4979.88                  |
| 6   | XJP7                | 17.82               | 350.47                 | 4618.52                  |
| 7   | HX1                 | 20.61               | 249.44                 | 2915.79                  |
| 8   | Super Red           | 43.59               | 238.19                 | 5162.87                  |
| 9   | Red Love            | 125.21              | 132.67                 | 5468.42                  |
| 10  | Fuji                | 231.45              | 12.80                  | 221.24                   |
