# Supplementary material for: Red-Fleshed Apple Anthocyanin Extract Reduces Furan Content in Ground Coffee, Maillard Model System, and Not-from-Concentrate Apple Juice
Source: MDPI journal article supplement (doi:10.3390/foods10102423), 2021-10-13
Supplement: s1 [file s1]

**Table S2.** Characteristics detection and quality evaluation of fruit and juice for processing juice in apple varieties (strains) selected in this study.

| No. | Variety (Strain) | Fruit Weight (g) | pH   | Juice Yield (%) | TA (%) | TSS (°Brix) | Total Phenols (mg/L) | Color Value (L) |
|-----|------------------|------------------|------|-----------------|--------|-------------|----------------------|-----------------|
| 1   | Fuji             | 155.73           | 3.90 | 62.08           | 0.377  | 11.40       | 1730.74              | 30.95           |
| 2   | Fuli             | 239.80           | 4.43 | 67.94           | 0.280  | 16.70       | 2713.82              | 30.74           |
| 3   | Fuxing           | 119.70           | 4.26 | 64.15           | 0.380  | 13.40       | 2020.21              | 33.62           |
| 4   | 2010-W17-1Z-N9   | 100.55           | 3.96 | 62.96           | 0.330  | 14.50       | 1112.32              | 28.52           |
| 5   | 2008-W18-N16     | 113.73           | 3.53 | 66.19           | 0.270  | 14.60       | 2862.32              | 30.02           |
| 6   | 2010-W14-11Z-N9  | 131.30           | 3.45 | 52.75           | 0.620  | 10.40       | 2605.74              | 30.78           |
| 7   | 2010-W14-12Z-N3  | 104.23           | 4.38 | 50.38           | 0.684  | 14.03       | 2303.11              | 34.69           |
| 8   | 2010-W14-3Z-N3   | 97.43            | 3.66 | 64.11           | 0.640  | 11.90       | 1566.26              | 31.51           |
| 9   | 2010-W10-3Z-N2   | 180.73           | 3.54 | 70.59           | 0.680  | 12.10       | 2980.74              | 33.44           |
| 10  | 2009-E11-S5      | 138.62           | 4.03 | 53.21           | 0.610  | 12.47       | 3243.89              | 36.99           |
| 11  | 2010-W5-N2       | 218.20           | 3.56 | 46.06           | 0.620  | 10.20       | 1586.00              | 30.19           |
| 12  | 2010-W7-8Z-N8    | 133.10           | 3.57 | 54.33           | 0.640  | 11.00       | 3901.79              | 37.40           |
