# Supplementary material for: Red-Fleshed Apple Anthocyanin Extract Reduces Furan Content in Ground Coffee, Maillard Model System, and Not-from-Concentrate Apple Juice
Source: MDPI journal article supplement (doi:10.3390/foods10102423), 2021-10-13
Supplement: s1 [file s1]

**Table S3.** Sensory assessment of ground coffee after adding RAAE.

| <b>Group</b>                  | <b>Color</b> | <b>Aroma</b> | <b>Abundance</b> | <b>Astringency</b> | <b>Aftertaste</b> | <b>Global Impression</b> |
|-------------------------------|--------------|--------------|------------------|--------------------|-------------------|--------------------------|
| Ground Coffee                 | brown        | flowery      | mellow           | soft               | rich              | supple                   |
| Coffee + XJ1 (10 µg/mL)       | brown        | flowery      | moderate         | micro astringent   | rich              | supple                   |
| Coffee + XJ2 (10 µg/mL)       | brown        | flowery      | mellow           | soft               | rich              | supple                   |
| Coffee + XJ3 (5 µg/mL)        | brown        | flowery      | mellow           | soft               | rich              | full                     |
| Coffee + XJ3 (10 µg/mL)       | brown        | flowery      | mellow           | soft               | rich              | full                     |
| Coffee + XJ3 (20 µg/mL)       | brown        | flowery      | mellow           | soft               | rich              | supple                   |
| Coffee + XJ3 (40 µg/mL)       | brown        | flowery      | mellow           | soft               | rich              | supple                   |
| Coffee + XJ3 (80 µg/mL)       | brown        | spicery      | moderate         | soft               | rich              | supple                   |
| Coffee + XJ3 (100 µg/mL)      | brown        | spicery      | moderate         | micro astringent   | rich              | supple                   |
| Coffee + XJ5 (10 µg/mL)       | brown        | flowery      | mellow           | soft               | rich              | supple                   |
| Coffee + XJP5 (10 µg/mL)      | brown        | flowery      | mellow           | soft               | rich              | supple                   |
| Coffee + XJP7 (10 µg/mL)      | brown        | flowery      | mellow           | micro astringent   | rich              | supple                   |
| Coffee + HX1 (10 µg/mL)       | brown        | flowery      | mellow           | soft               | rich              | supple                   |
| Coffee + Super Red (10 µg/mL) | brown        | flowery      | moderate         | soft               | rich              | supple                   |
| Coffee + Red Love (10 µg/mL)  | brown        | flowery      | mellow           | soft               | rich              | supple                   |
| Coffee + Fuji (10 µg/mL)      | brown        | flowery      | moderate         | soft               | rich              | supple                   |
