# Supplementary material for: Red-Fleshed Apple Anthocyanin Extract Reduces Furan Content in Ground Coffee, Maillard Model System, and Not-from-Concentrate Apple Juice
Source: MDPI journal article supplement (doi:10.3390/foods10102423), 2021-10-13
Supplement: s1 [file s1]

**Table S4.** Sensory assessment of NFC apple juice after adding RAAE.

| Group                               | Color            | Aroma      | Sweetness<br>and Sourness | Abundance | Astringency      | Aftertaste | Global<br>Impression |
|-------------------------------------|------------------|------------|---------------------------|-----------|------------------|------------|----------------------|
| Fuji + XJ3<br>(20 µg/mL)            | khaki            | flat aroma | sweet-sour                | moderate  | soft             | flat       | supple               |
| Fuli + XJ3<br>(20 µg/mL)            | khaki            | flat aroma | sweet                     | moderate  | soft             | flat       | supple               |
| Fuxing + XJ3<br>(20 µg/mL)          | yellowish        | fragrance  | sour-sweet                | moderate  | soft             | obvious    | supple               |
| 2010-W17-1Z-N9 +<br>XJ3 (20 µg/mL)  | khaki            | flat aroma | slightly<br>sweet         | moderate  | micro astringent | flat       | hard                 |
| 2008-W18-N16 + XJ3<br>(20 µg/mL)    | maize-<br>yellow | fresh      | tart                      | moderate  | micro astringent | obvious    | harmonious           |
| 2010-W14-11Z-N9 +<br>XJ3 (20 µg/mL) | maize-<br>yellow | flat aroma | aceti                     | moderate  | soft             | flat       | round                |
| 2010-W14-12Z-N3 +<br>XJ3 (20 µg/mL) | buff             | flat aroma | aceti                     | moderate  | soft             | flat       | supple               |
| 2010-W14-3Z-N3 +<br>XJ3 (20 µg/mL)  | maize-<br>yellow | fresh      | tart                      | moderate  | micro astringent | obvious    | hard                 |
| 2010-W10-3Z-N2 +<br>XJ3 (20 µg/mL)  | yellowish        | aromatic   | sweet-sour                | mellow    | soft             | obvious    | full                 |
| 2009-E11-S5 + XJ3 (20<br>µg/mL)     | wheat            | aromatic   | aceti                     | moderate  | soft             | obvious    | supple               |
| 2010-W5-N2 + XJ3 (20<br>µg/mL)      | wheat            | flat aroma | sweet-sour                | moderate  | soft             | flat       | supple               |
| 2010-W7-8Z-N8 +<br>XJ3 (20 µg/mL)   | maize-<br>yellow | flat aroma | sweet-sour                | mellow    | soft             | obvious    | supple               |
