# Supplementary figures and images for: Red-Fleshed Apple Anthocyanin Extract Reduces Furan Content in Ground Coffee, Maillard Model System, and Not-from-Concentrate Apple Juice
Source: MDPI journal article supplement (doi:10.3390/foods10102423), 2021-10-13

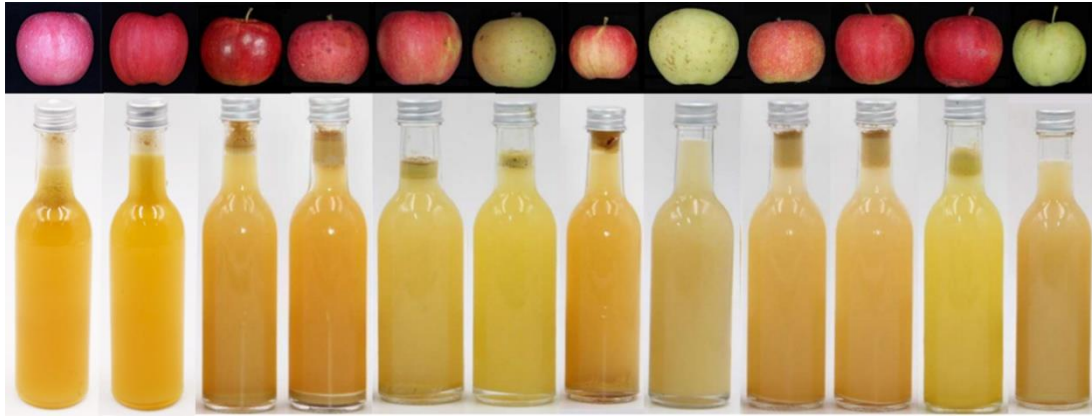

**Figure S2.** Appearance of fruits and juices of different apple varieties (strains).

Supplement: s1 [file s1]
